# Supplementary material for: Increasing Acyl CoA thioesterase activity alters phospholipid profile without effect on insulin action in skeletal muscle of rats
Source: PubMed Central journal article supplement (PMC6143561; doi:10.1038/s41598-018-32354-w), 2018-09-18

Increasing Acyl CoA thioesterase 7 activity alters phospholipid profile without effect on insulin action in skeletal muscle of rats.

Ishita Bakshi<sup>1</sup>, Simon H.J. Brown<sup>2</sup>, Amanda E Brandon<sup>1,3</sup>, Eurwin Suryana<sup>1</sup>, Todd W. Mitchell<sup>2</sup>, Nigel Turner<sup>4</sup>, and Gregory J Cooney<sup>1,3\*</sup>

<sup>1</sup>Diabetes and Metabolism Division, Garvan Institute, Sydney, Australia. <sup>2</sup>School of Biological Sciences, University of Wollongong, Wollongong, Australia. <sup>3</sup>Sydney Medical School, Charles Perkins Centre, University of Sydney, Sydney, Australia. <sup>4</sup>Department of Pharmacology, University of New South Wales, Sydney, Australia.

**A**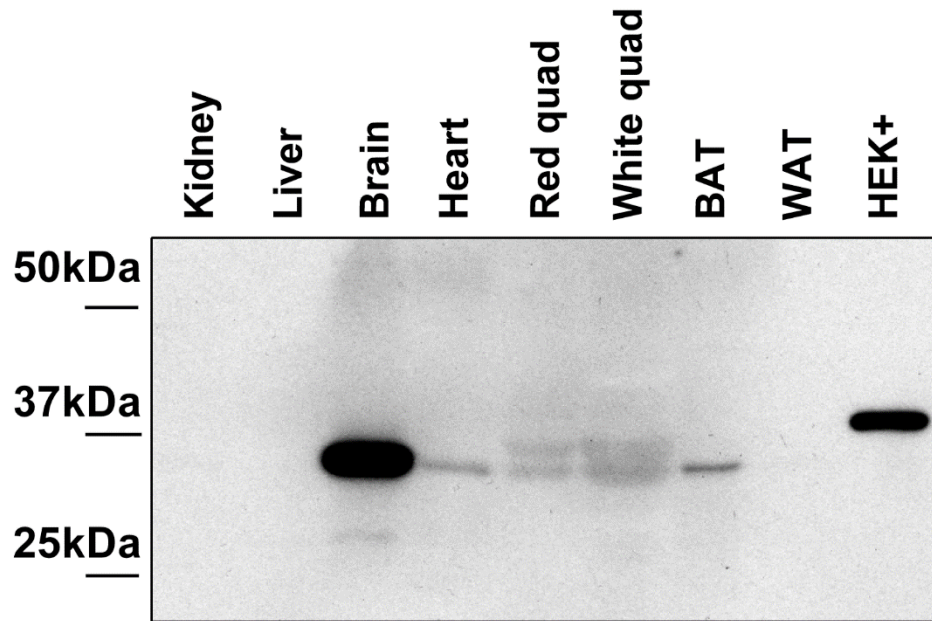**B**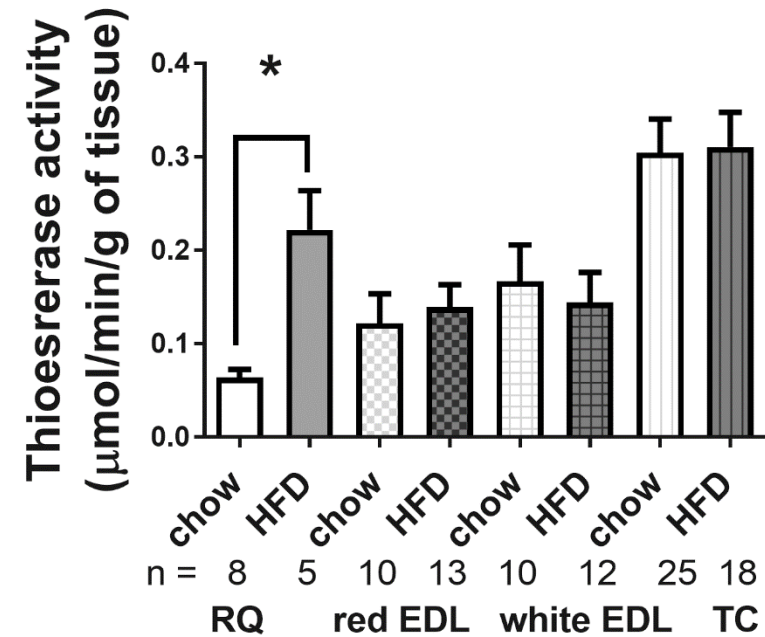

**Supplementary Figure 1. Tissue distribution profile of Acot7 and effect of HFD on thioesterase activity in different muscles.** Tissue distribution of Acot7 with the tissue indicated at the top of each lane. HEK+ indicates HEK cells transfected with flag tagged Acot7 (A). Thioesterase activity was measured in different skeletal muscles (RQ, red quadriceps; red EDL, red extensor digitorum longus; white EDL, white extensor digitorum longus; TC tibialis cranialis) of chow and high fat fed rats (B).  $n=5-25$ . Data is mean  $\pm$  SEM,  $*p<0.05$ , unpaired  $t$ -test.

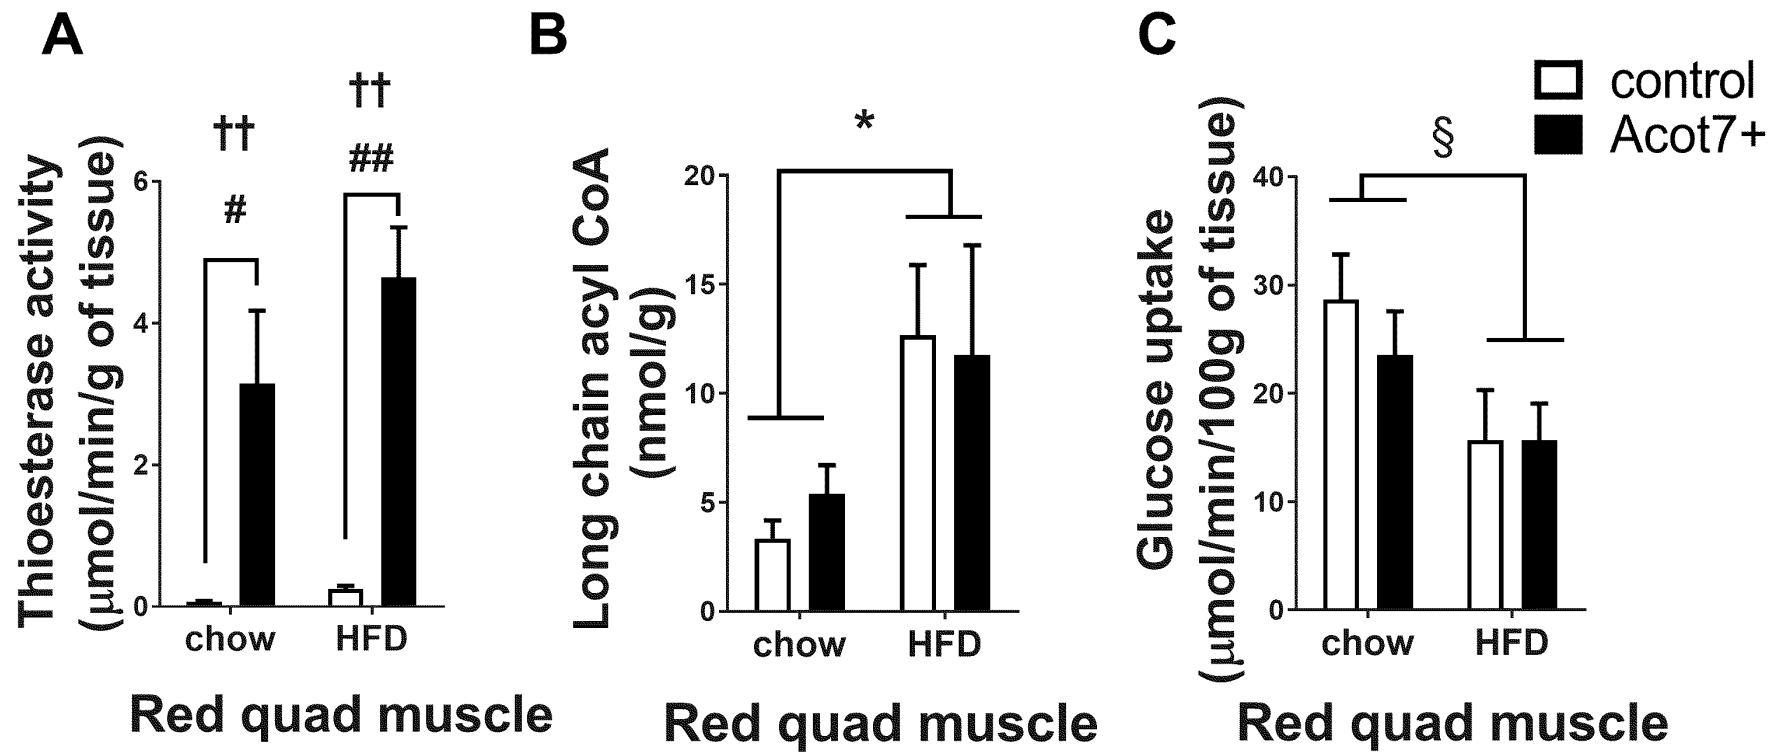

**Supplementary Figure 2. Effect of Acot7 on red quadricep muscle.** Thioesterase activity (A), Long chain acyl CoA (B) and glucose uptake (C) in the red quadricep muscle from chow and HFD fed animals. \* $p < 0.05$ , 2-way ANOVA, effect of diet; †† $p < 0.01$  2-way ANOVA, effect of Acot7; # $p < 0.05$ , ## $p < 0.01$  post hoc Holm and Sidak test, § $p < 0.05$  Fisher test.

**Table 1. Lipid species altered by diet and or Acot7.**

| Lipid class                                    | Lipid species | Lipid levels detected (nmol/g) |                         |             |            | 2-way ANOVA |      |       |
|------------------------------------------------|---------------|--------------------------------|-------------------------|-------------|------------|-------------|------|-------|
|                                                |               | Control Chow                   | Acot7 Chow              | Control HFD | Acot7 HFD  | Interaction | Diet | Acot7 |
| LPC                                            | 18:1          | 17.6 ± 1                       | 13.8 ± 0.9 <sup>#</sup> | 13.6 ± 1    | 11.6 ± 0.6 |             | **   | *     |
| LPC                                            | 18:2          | 27 ± 2                         | 21.3 ± 1.1              | 18.3 ± 2.2  | 14.4 ± 1.4 |             | **   | *     |
| TAG                                            | 48:3          | 6.7 ± 0.6                      | 13.2 ± 2.2 <sup>#</sup> | 5.7 ± 1.5   | 7.1 ± 0.7  |             | *    | *     |
| Lipids altered with Acot7 overexpression alone |               |                                |                         |             |            |             |      |       |
| Cer                                            | 16:0          | 3.1 ± 0.3                      | 4.2 ± 0.3 <sup>#</sup>  | 3 ± 0.1     | 3.2 ± 0.3  |             |      | *     |
| Cer                                            | 22:0          | 1.9 ± 0.2                      | 1.6 ± 0.1               | 1.9 ± 0.1   | 1.4 ± 0.1  |             |      | *     |
| LPC                                            | 22:4          | 4.7 ± 0.6                      | 2.7 ± 0.7 <sup>##</sup> | 4 ± 0.1     | 4.8 ± 0.4  | **          |      |       |
| SM                                             | 23:1          | 12.9 ± 1.8                     | 7.2 ± 1.3 <sup>#</sup>  | 7.6 ± 1.4   | 9 ± 0.8    | *           |      |       |
| SM                                             | 23:2          | 3.1 ± 1.4                      | 0.1 ± 0.1 <sup>#</sup>  | 0           | 0.5 ± 0.4  | *           |      |       |
| SM                                             | 26:2          | 0.3 ± 0.3                      | 2.1 ± 0.9 <sup>#</sup>  | 0           | 0.4 ± 0.2  |             |      | *     |
| PG                                             | 18:1_18:1     | 4.9 ± 0.4                      | 3.5 ± 0.4 <sup>##</sup> | 3.6 ± 0.4   | 3.2 ± 0.4  |             |      | **    |
| PG                                             | 18:1_18:2     | 1.2 ± 0.5                      | 0.3 ± 0.2 <sup>#</sup>  | 0.9 ± 0.2   | 1.6 ± 0.2  | **          |      |       |
| TAG                                            | 56:8          | 1.9 ± 0.8                      | 5.2 ± 0.9 <sup>#</sup>  | 3.2 ± 0.6   | 3.9 ± 0.3  |             |      | *     |
| TAG                                            | 58:8          | 1.2 ± 0.3                      | 2.8 ± 0.7               | 1 ± 0.1     | 2.7 ± 0.8  |             |      | *     |
| TAG                                            | 58:9          | 0.1 ± 0.1                      | 1 ± 0.5                 | 0           | 0.6 ± 0.3  |             |      | *     |

|                                                                                                                                                                                                                  |       |            |                         |              |                          |    |  |   |
|------------------------------------------------------------------------------------------------------------------------------------------------------------------------------------------------------------------|-------|------------|-------------------------|--------------|--------------------------|----|--|---|
| CL                                                                                                                                                                                                               | 72:5  | 66 ± 16.4  | 72.4 ± 8.5              | 111.8 ± 12.4 | 66.9 ± 10.1 <sup>#</sup> | *  |  |   |
| CL                                                                                                                                                                                                               | 72:8  | 1446 ± 86  | 970 ± 72 <sup>#</sup>   | 1163.7 ± 159 | 1079.7 ± 86.4            |    |  | * |
| CL                                                                                                                                                                                                               | 76:11 | 48.3 ± 7.5 | 15.7 ± 3.6 <sup>#</sup> | 26.1 ± 5.9   | 39.1 ± 9                 | ** |  |   |
| Different lipid species content that are altered by Acot7 overexpression. Data is mean ± SEM, nmol/g. 2-way ANOVA * p<0.05, ** p<0.01 was followed by post hoc Sidak test was performed, #p<0.05, ## p<0.01. n=6 |       |            |                         |              |                          |    |  |   |

**Table 2. Effect of diet and Acot7 overexpression on Phosphatidylethanolamine species.**

| PE Species | Control Chow | Acot7 Chow | Control HFD | Acot7 HFD | 2-way ANOVA |
|------------|--------------|------------|-------------|-----------|-------------|
|------------|--------------|------------|-------------|-----------|-------------|

|                     |            |                          |             |             | <b>Interaction</b> | <b>Diet</b> | <b>Acot7</b> |
|---------------------|------------|--------------------------|-------------|-------------|--------------------|-------------|--------------|
| PE (34:1) 16:0_18:1 | 32.3±2.4   | 26.2±1.6                 | 28.5±2.4    | 24.8±1.4    |                    |             | *            |
| PE (34:1) 16:1_18:0 | 6.9±0.6    | 4.3±0.4 <sup>##</sup>    | 2.1±0.7     | 2.6±0.2     | **                 | **          | *            |
| PE (34:2) 16:0_18:2 | 69±4.5     | 48.8±1.1 <sup>##</sup>   | 47.7±6.5    | 36.2±3.1    |                    | **          | **           |
| PE (34:2) 16:1_18:1 | 4.7±0.5    | 1.7±0.4 <sup>##</sup>    | 1±0.5       | 0.2±0.2     | **                 | **          | **           |
| PE (36:0) 18:0_18:0 | 6.5±0.1    | 5.5±0.4                  | 4.3±0.3     | 4.6±0.3     |                    | **          |              |
| PE (36:1) 18:0_18:1 | 53.3±2.8   | 37.2±1.4 <sup>##</sup>   | 37.8±2.1    | 35.6±2.2    | *                  | **          | **           |
| PE (36:2) 18:0_18:2 | 357.9±17.1 | 230.2±8.3 <sup>##</sup>  | 229.1±27.5  | 184.2±16.1  | *                  | **          | **           |
| PE (36:2) 18:1_18:1 | 17.2±0.8   | 10.5±0.5 <sup>##</sup>   | 8.6±0.5     | 7.9±0.4     | **                 | **          | **           |
| PE (36:3) 16:0_20:3 | 6.3±0.4    | 5.9±0.7                  | 4.8±0.5     | 3.6±0.3     |                    | **          |              |
| PE (36:3) 18:1_18:2 | 127.5±6.8  | 77.5±4.2 <sup>##</sup>   | 57.4±5.7    | 49.1±4      | **                 | **          | **           |
| PE (36:4) 16:0_20:4 | 80.1±3.8   | 71.5±3.3                 | 102.1±5.6   | 110.5±5     |                    | **          |              |
| PE (36:4) 18:2_18:2 | 57.7±3.9   | 35.3±1.3 <sup>##</sup>   | 27.9±4.6    | 25.6±1.6    | **                 | **          | **           |
| PE (36:5) 16:0_20:5 | 3.2±0.4    | 1±0.3 <sup>##</sup>      | 0           | 0           | **                 | **          | **           |
| PE (36:5) 16:1_20:4 | 7.7±0.6    | 5.5±0.3 <sup>##</sup>    | 4.2±0.3     | 3.6±0.4     | *                  | **          | **           |
| PE (38:3) 18:0_20:3 | 100.4±4.8  | 77.8±3.4 <sup>##</sup>   | 112.7±5.9   | 116.3±6.6   |                    | **          |              |
| PE (38:4) 16:0_22:4 | 26.9±1.1   | 20.9±1.1 <sup>##</sup>   | 45.8±1.9    | 45.3±1.7    |                    | **          |              |
| PE (38:4) 18:0_20:4 | 767±31.7   | 633.2±28 <sup>#</sup>    | 1037.3±58.7 | 1097.5±64.8 |                    | **          |              |
| PE (38:4) 18:1_20:3 | 4.9±0.4    | 3.2±0.4 <sup>#</sup>     | 1.5±0.4     | 1.3±0.3     |                    | **          | *            |
| PE (38:5) 16:0_22:5 | 56.9±1.6   | 43.4±2 <sup>##</sup>     | 90.8±8.9    | 94.4±7.8    |                    | **          |              |
| PE (38:5) 18:0_20:5 | 45.4±2.3   | 21.5±1.8 <sup>##</sup>   | 5.5±0.7     | 4.6±0.7     | **                 | **          | **           |
| PE (38:5) 18:1_20:4 | 142.6±7.3  | 104.2±4.4 <sup>##</sup>  | 113.6±8.1   | 111.2±6.7   | *                  |             | *            |
| PE (38:5) 18:2_20:3 | 3.4±0.4    | 1.1±0.6 <sup>##</sup>    | 0           | 0.2±0.2     | **                 | **          | *            |
| PE (38:6) 16:0_22:6 | 345.1±13.8 | 265.8±13.5 <sup>##</sup> | 143.7±12.6  | 152±12      | **                 | **          | *            |
| PE (38:6) 16:1_22:5 | 12±0.7     | 10.5±0.5 <sup>#</sup>    | 10.3±0.8    | 11.8±0.7    | *                  |             |              |
| PE (38:6) 18:1_20:5 | 9.4±0.9    | 3.8±1 <sup>##</sup>      | 0           | 0           | **                 | **          | **           |

|                         |           |                           |            |                        |    |    |    |
|-------------------------|-----------|---------------------------|------------|------------------------|----|----|----|
| PE (38:6) 18:2_20:4     | 45.6±1.5  | 35.3±2.2 <sup>#</sup>     | 42.9±2.5   | 46.8±2.9               | *  |    |    |
| PE (38:7) 16:1_22:6     | 16.5±0.8  | 10.2±0.7 <sup>##</sup>    | 6±0.7      | 5.6±0.4                | ** | ** | ** |
| PE (40:4) 18:0_22:4     | 45.1±2.4  | 29.6±1.4 <sup>##</sup>    | 93±6.2     | 92.8±6.1               |    | ** |    |
| PE (40:5) 18:0_22:5     | 291.3±14  | 212.6±8.3 <sup>##</sup>   | 455.4±46.9 | 487.7±42.5             |    | ** |    |
| PE (40:5) 18:1_22:4     | 22.9±1.5  | 14.2±1.5 <sup>##</sup>    | 15.2±0.9   | 14.6±0.9               | *  | ** | *  |
| PE (40:6) 18:0_22:6     | 1591.3±73 | 1176.9±54.5 <sup>##</sup> | 774.9±54.5 | 810.5±61.9             | ** | ** | *  |
| PE (40:6) 18:1_22:5     | 48.6±2.9  | 29.6±2 <sup>##</sup>      | 45.4±3.8   | 45.7±2.8               | ** |    | ** |
| PE (40:7) 18:1_22:6     | 407±29.1  | 253.3±16.9 <sup>##</sup>  | 136.4±8    | 133.6±8.1              | ** | ** | ** |
| PE (40:8) 18:2_22:6     | 180±9.3   | 122.1±6.5 <sup>##</sup>   | 66.3±3.5   | 63.9±4.6               | ** | ** | ** |
| PE (42:10) 20:4_22:6    | 7.2±0.9   | 4.8±0.4 <sup>##</sup>     | 3.3±0.3    | 3.1±0.3                | *  | ** | *  |
| PE (42:9) 20:3_22:6     | 21.6±1.8  | 5.5±3.5 <sup>##</sup>     | 3.8±2.5    | 4.9±2.2                | *  | ** | *  |
| PE (O_34:1) O_18:1_16:0 | 13.9±1.2  | 11.9±0.9                  | 14.2±1     | 11±2.4                 |    |    |    |
| PE (O_34:2) O_16:1_18:1 | 4.3±0.5   | 4.3±0.5                   | 4.7±0.4    | 3.9±0.2                |    |    |    |
| PE (O_34:2) O_18:2_16:0 | 9±0.9     | 8.2±1.1                   | 8.1±0.8    | 7.2±0.7                |    |    |    |
| PE (O_34:3) O_16:1_18:2 | 1.2±1.2   | 0                         | 2.8±1.3    | 3.9±1.3                |    |    |    |
| PE (O_36:2) O_18:1_18:1 | 37.6±3.5  | 25.2±1.3 <sup>##</sup>    | 16.2±1.1   | 12.9±1.1               | *  | ** | ** |
| PE (O_36:3) O_18:1_18:2 | 6±2.7     | 5.9±1.9                   | 10.2±1.2   | 8.2±1.7                |    |    |    |
| PE (O_36:4) O_16:1_20:3 | 7.9±1.6   | 7.1±1.8                   | 9.4±0.5    | 8.9±0.8                |    |    |    |
| PE (O_36:5) O_16:1_20:4 | 31.4±1.2  | 26.1±1.9                  | 41.7±2.8   | 43.4±2.9               |    | ** |    |
| PE (O_38:4) O_18:0_20:4 | 56.4±3.6  | 44.3±1.9                  | 49±7.9     | 40.9±2.8               |    |    | *  |
| PE (O_38:4) O_18:1_20:3 | 10.7±2.3  | 6.2±2.8                   | 13.2±4.6   | 24.2±2.5 <sup>##</sup> | ** | *  |    |
| PE (O_38:5) O_16:1_22:4 | 22.3±1.8  | 19.3±0.8                  | 48±3.9     | 49±2.8                 |    | ** |    |
| PE (O_38:5) O_18:1_20:4 | 44.8±2.9  | 39.6±3.2                  | 63.8±2.1   | 74.1±3.6 <sup>#</sup>  | *  | ** |    |
| PE (O_38:5) O_18:2_20:3 | 1.7±0.4   | 1±0.5                     | 0.4±0.2    | 0.9±0.3                |    |    |    |
| PE (O_38:6) O_16:1_22:5 | 88.3±3.6  | 76.7±3.3                  | 106.1±5.8  | 117.2±5.1              |    | ** |    |
| PE (O_38:6) O_18:1_20:5 | 2.1±0.2   | 2±0.1                     | 0          | 0.1±0.1                |    | ** |    |
| PE (O_38:6) O_18:2_20:4 | 36.8±1.6  | 34.2±3.3                  | 25.6±1.6   | 28±2                   |    | ** |    |

|                                                                                                                                                                                                                            |           |                         |           |           |    |    |    |
|----------------------------------------------------------------------------------------------------------------------------------------------------------------------------------------------------------------------------|-----------|-------------------------|-----------|-----------|----|----|----|
| PE (O_38:7) O_16:1_22:6                                                                                                                                                                                                    | 173.8±3.3 | 153±8.4                 | 108.1±4.5 | 121.6±8.2 | *  | ** |    |
| PE (O_40:5) O_18:1_22:4                                                                                                                                                                                                    | 46.6±3.7  | 36.4±2.4                | 56.3±2.3  | 64.4±2.4  | *  | ** |    |
| PE (O_40:6) O_18:0_22:6                                                                                                                                                                                                    | 27.9±2.6  | 15.6±1 <sup>###</sup>   | 1.3±0.5   | 1.4±0.4   | ** | ** | ** |
| PE (O_40:6) O_18:1_22:5                                                                                                                                                                                                    | 108.3±4.1 | 87.1±5.4 <sup>#</sup>   | 81.1±3    | 91.9±5.6  | *  | *  |    |
| PE (O_40:6) O_18:2_22:4                                                                                                                                                                                                    | 20.8±1.4  | 12.7±1 <sup>###</sup>   | 11        | 10.1±0.4  | ** | ** | ** |
| PE (O_40:7) O_18:1_22:6                                                                                                                                                                                                    | 77.2±3.8  | 70.1±5.6                | 57.9±3.1  | 67.2±5.3  |    |    |    |
| PE (O_40:7) O_18:2_22:5                                                                                                                                                                                                    | 30.2±2.1  | 23.4±1.5 <sup>#</sup>   | 18.4±1.4  | 19.3±0.8  | *  | ** |    |
| PE (O_40:8) O_18:2_22:6                                                                                                                                                                                                    | 91.1±4.2  | 70.2±5.1 <sup>###</sup> | 30.1±1.2  | 34.2±2.2  | ** | ** | *  |
| Phosphatidylethanolamine content in each group. Data is mean ± SEM, nmol/g. *p<0.05, **p<0.01 2-way ANOVA followed by <sup>#</sup> p<0.05, <sup>###</sup> p<0.01, post hoc test Holm and Sidak or Sidak was performed. N=6 |           |                         |           |           |    |    |    |



**Table 3. Effect of diet and Acot7 overexpression in Phosphatidylcholine species.**

| PC Species          | Control Chow | Acot7 Chow                | Control HFD  | Acot7 HFD    | 2-way ANOVA |      |       |
|---------------------|--------------|---------------------------|--------------|--------------|-------------|------|-------|
|                     |              |                           |              |              | Interaction | Diet | Acot7 |
| PC (32:0) 16:0_16:0 | 239.3±20.4   | 212.4±11.8                | 243.3±5.4    | 250.9±19.1   |             |      |       |
| PC (32:1) 16:0_16:1 | 149.9±11     | 103.5±8.8 <sup>#</sup>    | 91.9±4.9     | 77.5±4.3     |             | **   | *     |
| PC (34:0) 16:0_18:0 | 18.1±2.3     | 16±1.5                    | 35.3±0.6     | 30.4±4.2     |             | **   |       |
| PC (34:1) 16:0_18:1 | 1566.4±100.3 | 1270.8±92.4               | 1211.4±49.4  | 1293.2±67.8  |             | **   |       |
| PC (34:1) 16:1_18:0 | 17.6±1.2     | 13.7±0.9                  | 11±1.3       | 9.4±0.6      |             | **   | *     |
| PC (34:2) 16:0_18:2 | 3236.1±229.1 | 2429.6±137.3 <sup>#</sup> | 1971.5±196.9 | 1598.6±127.8 |             | **   | *     |
| PC (34:2) 16:1_18:1 | 90.7±4.8     | 56.7±5.4 <sup>###</sup>   | 35±1.5       | 26.7±1.4     | *           | **   | **    |
| PC (34:3) 16:0_18:3 | 68.4±4.6     | 46.1±2.7 <sup>###</sup>   | 22.6±1.2     | 18.1±1.1     | *           | **   | **    |
| PC (34:3) 16:1_18:2 | 42.9±2.1     | 35.4±3.5                  | 23.8±1.4     | 26±2.6       |             | **   |       |
| PC (36:0) 18:0_18:0 | 97.8±4.5     | 89.5±7.8                  | 53.2±3.2     | 65.2±5       |             | **   |       |
| PC (36:1) 18:0_18:1 | 165.1±13.1   | 134.6±5.7                 | 152.8±5.8    | 144.6±13     |             |      |       |
| PC (36:2) 18:0_18:2 | 964.4±62.8   | 709.2±47.9 <sup>#</sup>   | 647.4±63.5   | 553.2±61.9   |             | **   | **    |
| PC (36:2) 18:1_18:1 | 322.1±12.5   | 209.5±15.3 <sup>###</sup> | 156.7±5.4    | 142.8±7      | **          | **   | **    |
| PC (36:3) 16:0_20:3 | 211.3±9.2    | 177.7±11.1                | 116.9±8.9    | 106.5±8.1    |             | **   |       |
| PC (36:3) 18:1_18:2 | 668.3±27.6   | 417.5±22 <sup>###</sup>   | 290.9±23.5   | 211.7±22.4   | **          | **   | **    |
| PC (36:4) 16:0_20:4 | 2942.7±173.4 | 2504.5±115.4              | 4669.8±233   | 4854.6±242   |             | **   |       |
| PC (36:4) 18:2_18:2 | 183.8±17     | 119±4.4 <sup>###</sup>    | 69.2±8.1     | 48.3±5.6     | *           | **   | **    |
| PC (36:5) 16:0_20:5 | 181.7±12.6   | 105.4±5.4 <sup>###</sup>  | 32.6±3.5     | 24.5±1.3     | **          | **   | **    |
| PC (36:5) 16:1_20:4 | 43.7±2.7     | 30.7±2.4 <sup>#</sup>     | 51.5±4.6     | 44±4.5       |             | *    | *     |
| PC (38:3) 18:0_20:3 | 79.2±7       | 61.2±4.9                  | 35.5±5.1     | 27.9±1.7     |             | **   | *     |
| PC (38:4) 16:0_22:4 | 38.6±3.1     | 28.5±1.8                  | 110.2±6.2    | 110.2±8.9    |             | **   |       |
| PC (38:4) 18:0_20:4 | 901.7±58.5   | 779.1±42.9                | 1675.4±107.8 | 1733.5±163.2 |             | **   |       |
| PC (38:4) 18:1_20:3 | 33.2±2.3     | 22.7±1.7 <sup>###</sup>   | 8.1±1.4      | 10.5±1.2     | **          | **   | *     |
| PC (38:5) 16:0_22:5 | 321.6±28.8   | 285.6±15.1                | 375.9±27.8   | 435.9±34.2   |             | **   |       |
| PC (38:5) 18:0_20:5 | 18.5±1.3     | 11.4±0.8 <sup>###</sup>   | 0.8±0.8      | 0            | **          | **   | **    |
| PC (38:5) 18:1_20:4 | 416.7±15.9   | 306.4±16.3 <sup>###</sup> | 436.6±23.7   | 400.9±24.2   |             | **   | *     |

|                                                                                                                                                                                                   |             |                          |            |            |    |    |    |
|---------------------------------------------------------------------------------------------------------------------------------------------------------------------------------------------------|-------------|--------------------------|------------|------------|----|----|----|
| PC (38:5) 18:2_20:3                                                                                                                                                                               | 14±0.9      | 9.7±1.2 <sup>#</sup>     | 3.8±1.3    | 2.9±1.1    |    | ** | *  |
| PC (38:6) 16:0_22:6                                                                                                                                                                               | 1499.6±94.1 | 1360.7±68.5 <sup>#</sup> | 588.8±55   | 669.8±61.9 |    | ** |    |
| PC (38:6) 18:1_20:5                                                                                                                                                                               | 26.6±2.2    | 12.7±2.1 <sup>##</sup>   | 0          | 0          | ** | ** | ** |
| PC (38:6) 18:2_20:4                                                                                                                                                                               | 156.7±15.8  | 120.6±4.6                | 182.4±6.3  | 166.6±13   |    | ** |    |
| PC (40:4) 18:0_22:4                                                                                                                                                                               | 14.7±1.4    | 8.6±1.8 <sup>#</sup>     | 29.6±1.5   | 29.3±2.8   |    | ** |    |
| PC (40:5) 18:0_22:5                                                                                                                                                                               | 83.5±6.1    | 71.4±3.2                 | 103.4±8    | 105.9±11.1 |    | *  |    |
| PC (40:6) 18:0_22:6                                                                                                                                                                               | 261.5±14.1  | 228.1±9.1                | 115.1±12.2 | 123.6±14.4 |    | ** |    |
| PC (40:6) 18:1_22:5                                                                                                                                                                               | 29.5±2.7    | 19.7±1.4 <sup>#</sup>    | 19.4±2.5   | 21.3±1.6   | *  |    |    |
| PC (40:7) 18:1_22:6                                                                                                                                                                               | 150.6±8.7   | 105.2±5.7 <sup>##</sup>  | 46.5±3.4   | 45.2±3.9   | ** | ** | ** |
| PC (40:8) 18:2_22:6                                                                                                                                                                               | 99±7.6      | 78.4±5.1 <sup>#</sup>    | 39±3       | 39.3±2.8   |    | ** |    |
| PC (O_32:0) O_16:0_16:0                                                                                                                                                                           | 26.9±2.4    | 24.6±1                   | 17.2±0.4   | 16.4±1.1   |    | ** |    |
| PC (O_32:1) O_16:1_16:0                                                                                                                                                                           | 11.5±0.8    | 10.3±0.6                 | 12±0.3     | 12.5±1.2   |    |    |    |
| PC (O_34:1) O_18:1_16:0                                                                                                                                                                           | 65.9±3.1    | 52.2±3.1 <sup>#</sup>    | 36.6±0.9   | 35.8±2.6   |    | ** |    |
| PC (O_36:2) O_18:0_18:2                                                                                                                                                                           | 108.6±8.2   | 74.8±5.4 <sup>##</sup>   | 34.2±2.4   | 29.4±2.1   |    | ** | *  |
| PC (O_36:4) O_16:0_20:4                                                                                                                                                                           | 37.5±2.8    | 27.9±1.2 <sup>#</sup>    | 24.4±1.1   | 25.9±1.5   | *  | ** |    |
| PC (O_36:5) O_16:1_20:4                                                                                                                                                                           | 44.3±3.9    | 43.1±5.3                 | 64.8±2     | 78.8±6.8   |    | ** |    |
| PC (O_38:4) O_18:0_20:4                                                                                                                                                                           | 82.3±6.5    | 63.5±3.4                 | 74.5±3.6   | 71.1±4.9   |    |    |    |
| PC (O_38:5) O_18:1_20:4                                                                                                                                                                           | 33.4±2.3    | 25.5±1.4                 | 33.7±0.9   | 35.7±2.7   | *  | *  |    |
| Phosphatidylcholine content in each group. Data is mean ± SEM, nmol/g. *p<0.05, **p<0.01 2-way ANOVA followed by <sup>#</sup> p<0.05, <sup>##</sup> p<0.01 post hoc Sidak test was performed. N=6 |             |                          |            |            |    |    |    |

**Table 4. Effect of diet and Acot7 overexpression on DAG species.**

| DAG species          | Control Chow | Acot7 Chow | Control HFD | Acot7 HFD  | 2-way ANOVA |      |       |
|----------------------|--------------|------------|-------------|------------|-------------|------|-------|
|                      |              |            |             |            | Interaction | Diet | Acot7 |
| DAG (32:0) 16:0_16:0 | 90.2±4       | 98.7±13.9  | 112.5±6.3   | 120.6±11.8 |             | **   |       |

|                                                                                                                                                                        |            |            |            |            |  |    |  |
|------------------------------------------------------------------------------------------------------------------------------------------------------------------------|------------|------------|------------|------------|--|----|--|
| DAG (32:1) 16:0_16:1                                                                                                                                                   | 14.8±1.1   | 13.2±1.6   | 10.7±0.9   | 10.1±1     |  | *  |  |
| DAG (34:0) 16:0_18:0                                                                                                                                                   | 56.6±2.6   | 68.6±12.1  | 90.1±4.8   | 87.7±9.4   |  | ** |  |
| DAG (34:1) 16:0_18:1                                                                                                                                                   | 317.9±14.3 | 273.9±14.4 | 279.7±11.8 | 265.1±21.6 |  |    |  |
| DAG (34:2) 16:0_18:2                                                                                                                                                   | 100.6±5.3  | 92.3±5.5   | 112.1±7.3  | 110.3±7.9  |  |    |  |
| DAG (34:2) 16:1_18:1                                                                                                                                                   | 19.6±1.8   | 19.1±1.6   | 11.2±1     | 11.3±1.1   |  | ** |  |
| DAG (34:3) 16:1_18:2                                                                                                                                                   | 3.7±1.7    | 5±1.6      | 0          | 2.7±1.3    |  | *  |  |
| DAG (36:0) 18:0_18:0                                                                                                                                                   | 22.3±1.4   | 26.9±3.6   | 27.3±1.9   | 28.2±2.8   |  |    |  |
| DAG (36:1) 18:0_18:1                                                                                                                                                   | 32.4±3.9   | 32.5±1.5   | 68.6±5.3   | 55.3±5.7   |  | ** |  |
| DAG (36:2) 18:0_18:2                                                                                                                                                   | 27.8±3.1   | 27±1.8     | 46.9±3.6   | 38.5±3.3   |  | ** |  |
| DAG (36:2) 18:1_18:1                                                                                                                                                   | 185.4±13   | 161.5±9.2  | 170.6±13.7 | 151.2±16.4 |  |    |  |
| DAG (36:3) 18:1_18:2                                                                                                                                                   | 144.3±12.4 | 134.9±7    | 149.4±12.9 | 138.1±16.2 |  |    |  |
| DAG (36:4) 16:0_20:4                                                                                                                                                   | 6.2±1.5    | 7±1.5      | 18.6±2.2   | 18.6±1.6   |  | ** |  |
| DAG (36:4) 18:2_18:2                                                                                                                                                   | 22.7±2.9   | 19.3±1.4   | 23.7±2.4   | 22±2.8     |  |    |  |
| DAG (38:4) 18:0_20:4                                                                                                                                                   | 28±4.7     | 31±3.4     | 39.8±3.3   | 44.6±4.8   |  | *  |  |
| DAG (38:4) 18:1_20:3                                                                                                                                                   | 0.9±0.9    | 0          | 2±1.3      | 0.8±0.8    |  |    |  |
| DAG (38:5) 18:1_20:4                                                                                                                                                   | 8.2±3.8    | 10.7±2.3   | 18.4±2.6   | 16.3±1.8   |  | *  |  |
| DAG (38:6) 18:2_20:4                                                                                                                                                   | 0          | 0          | 4.2±1.4    | 4.1±1.4    |  | ** |  |
| DAG (40:5) 18:0_22:5                                                                                                                                                   | 2.5±1.8    | 1±1        | 10.7±2.6   | 12.2±2.7   |  | ** |  |
| DAG (40:6) 18:0_22:6                                                                                                                                                   | 19.2±3.9   | 21.9±4.3   | 14.5±3.6   | 18.1±2.5   |  |    |  |
| Diacylglyceride content in each group. Data is mean ± SEM, nmol/g. *p<0.05, **p<0.01 2-way ANOVA followed by #p<0.05, ##p<0.01 post hoc Sidak test was performed. N=6. |            |            |            |            |  |    |  |

**Table 5. Effect of diet and Acot7 overexpression on TAG species.**

| TAG species | Control Chow | Acot7 Chow | Control HFD | Acot7 HFD | 2-way ANOVA |      |       |
|-------------|--------------|------------|-------------|-----------|-------------|------|-------|
|             |              |            |             |           | Interaction | Diet | Acot7 |
| TAG 48:0    | 45.6±4       | 71.7±4.2   | 100±13.9    | 103.8±8.8 |             | **   |       |

|                                                                                                                                                           |            |                       |              |             |   |    |   |
|-----------------------------------------------------------------------------------------------------------------------------------------------------------|------------|-----------------------|--------------|-------------|---|----|---|
| TAG 48:1                                                                                                                                                  | 75.4±6.5   | 124.8±18.3            | 110.4±21.3   | 113.2±9.5   |   |    |   |
| TAG 48:2                                                                                                                                                  | 45.3±4.6   | 79.4±12               | 55.5±11.9    | 60.7±5.6    |   |    |   |
| TAG 48:3                                                                                                                                                  | 6.7±0.6    | 13.2±2.2 <sup>#</sup> | 5.7±1.5      | 7.1±0.7     |   | *  | * |
| TAG 50:0                                                                                                                                                  | 24.1±1.6   | 34.5±3                | 80.5±9.2     | 84±7.8      |   | ** |   |
| TAG 50:1                                                                                                                                                  | 266.2±24.2 | 382.2±48.8            | 597.8±97.2   | 635±43.6    |   | ** |   |
| TAG 50:2                                                                                                                                                  | 306.4±31.1 | 491.2±68.8            | 578.7±106.5  | 612.3±45    |   | ** |   |
| TAG 50:3                                                                                                                                                  | 124.8±14.1 | 216.3±34.6            | 182.1±37.8   | 195.1±14.1  |   |    |   |
| TAG 50:4                                                                                                                                                  | 24.3±3.1   | 43.7±7                | 28.1±6.4     | 30.8±2      |   |    |   |
| TAG 52:0                                                                                                                                                  | 4.4±0.7    | 8.1±1.2               | 21.2±2       | 22.6±2.5    |   | ** |   |
| TAG 52:1                                                                                                                                                  | 77.7±7     | 100.8±12              | 274.2±41.3   | 283.6±21.4  |   | ** |   |
| TAG 52:2                                                                                                                                                  | 453.8±48.4 | 653.9±91.9            | 1007.5±174.9 | 1068.4±79.7 |   | ** |   |
| TAG 52:3                                                                                                                                                  | 442.4±55.2 | 703.7±109.9           | 908±166.8    | 991.1±75.1  |   | ** |   |
| TAG 52:4                                                                                                                                                  | 170.5±22.7 | 290.8±48.8            | 282.3±54.5   | 308.4±23.7  |   |    |   |
| TAG 52:5                                                                                                                                                  | 37±5.3     | 66.5±10.9             | 36±7.5       | 40.5±3.5    |   | *  |   |
| TAG 54:0                                                                                                                                                  | 0          | 0.6±0.4               | 1.8±0.4      | 1±0.4       | * | *  |   |
| TAG 54:1                                                                                                                                                  | 5.7±0.4    | 7.2±1                 | 30.2±4.2     | 30.7±3      |   | ** |   |
| TAG 54:2                                                                                                                                                  | 55.5±7     | 77.8±11.2             | 208.4±33.5   | 215.9±18.7  |   | ** |   |
| TAG 54:3                                                                                                                                                  | 224.2±27.6 | 339.7±54.5            | 522.4±100.3  | 552.9±38.3  |   | ** |   |
| TAG 54:4                                                                                                                                                  | 241.1±32.6 | 376.3±63.6            | 476.2±90.6   | 511.8±33.7  |   | ** |   |
| TAG 54:5                                                                                                                                                  | 115.1±16.4 | 189.7±31.8            | 193.4±34.8   | 212.7±15.4  |   | *  |   |
| TAG 54:6                                                                                                                                                  | 47±8.8     | 66.1±10.3             | 49.3±9.1     | 52.8±4.6    |   |    |   |
| TAG 56:4                                                                                                                                                  | 6.4±0.8    | 9.5±1.5               | 17.8±2.9     | 19.3±1.5    |   | ** |   |
| TAG 56:5                                                                                                                                                  | 7.4±1.4    | 11.5±1.9              | 26.1±3.6     | 28.3±2.1    |   | ** |   |
| TAG 56:6                                                                                                                                                  | 22.8±5.7   | 22.7±3.5              | 32.4±5       | 36.8±3      |   | ** |   |
| TAG 56:7                                                                                                                                                  | 10±1.5     | 16.9±2.6              | 16.7±2.2     | 19±1.3      |   | *  |   |
| TAG 56:8                                                                                                                                                  | 1.9±0.8    | 5.2±0.9 <sup>#</sup>  | 3.2±0.6      | 3.9±0.3     |   |    | * |
| TAG 58:8                                                                                                                                                  | 1.2±0.3    | 2.8±0.7               | 1±0.1        | 2.7±0.8     |   |    | * |
| TAG 58:9                                                                                                                                                  | 0.1±0.1    | 1±0.5                 | 0            | 0.6±0.3     |   |    | * |
| Triglyceride content in each group. Data is mean ± SEM, nmol/g. *p<0.05, **p<0.01 2-way ANOVA followed by <sup>#</sup> p<0.05, <sup>###</sup> p<0.01 post |            |                       |              |             |   |    |   |

hoc Sidak test was performed. N=6.

**Table 6. Effect of diet and Acot7 overexpression on Sphingomyelin species.**

| SM species | Control Chow | Acot7 Chow           | Control HFD | Acot7 HFD  | 2-way ANOVA |      |       |
|------------|--------------|----------------------|-------------|------------|-------------|------|-------|
|            |              |                      |             |            | Interaction | Diet | Acot7 |
| SM 13:0    | 0            | 0.1±0.1              | 0.1±0.1     | 0.5±0.3    |             |      |       |
| SM 14:0    | 0.2±0.2      | 0                    | 0.3±0.2     | 0.2±0.2    |             |      |       |
| SM 15:0    | 1.4±0.4      | 1.4±0.4              | 1±0.2       | 0.9±0.3    |             |      |       |
| SM 16:0    | 115.2±9.7    | 105.5±9.9            | 96.4±5.1    | 107.3±6.1  |             |      |       |
| SM 16:1    | 5±0.6        | 5±0.6                | 4.5±0.2     | 5.1±0.3    |             |      |       |
| SM 17:0    | 13.9±1.4     | 12.1±1.3             | 6.2±0.4     | 6±0.3      |             | **   |       |
| SM 18:0    | 515.6±37.8   | 434.7±47.5           | 419.3±40.6  | 458.5±24.1 |             |      |       |
| SM 18:1    | 39.5±2.3     | 32.7±3.7             | 34.8±2.9    | 36.7±1.6   |             |      |       |
| SM 19:0    | 10±2         | 9.5±1.1              | 2.5±0.7     | 2.6±0.9    |             | **   |       |
| SM 21:0    | 0.2±0.2      | 0                    | 1±0.4       | 1.5±0.9    |             | *    |       |
| SM 21:1    | 0.1±0.1      | 0.8±0.5              | 0.2±0.1     | 0.3±0.1    |             |      |       |
| SM 23:0    | 26.4±3.1     | 19.8±2.5             | 12.9±1.5    | 15.3±0.8   |             | **   |       |
| SM 23:1    | 12.9±1.8     | 7.2±1.3 <sup>#</sup> | 7.6±1.4     | 9±0.8      | *           |      |       |
| SM 23:2    | 3.1±1.4      | 0.1±0.1 <sup>#</sup> | 0           | 0.5±0.4    | *           |      |       |
| SM 24:0    | 66.3±5.3     | 54±4.1               | 41.1±3.8    | 46±3.1     |             | **   |       |
| SM 24:1    | 118.8±10.3   | 104.4±9              | 71±8.4      | 86.2±5.5   |             | **   |       |
| SM 24:3    | 13±8.2       | 9±4.9                | 0           | 0          |             |      |       |
| SM 26:0    | 5.1±0.6      | 3.5±0.5              | 2±0.7       | 3.3±0.6    | *           | *    |       |
| SM 26:1    | 3.7±0.5      | 2.2±0.7              | 3.2±0.5     | 3.7±0.3    |             |      |       |
| SM 26:2    | 0.3±0.3      | 2.1±0.9 <sup>#</sup> | 0           | 0.4±0.2    |             |      | *     |

Sphingomyelin content in each group. Data is mean ± SEM, nmol/g. \*p<0.05, \*\*p<0.01 2-way ANOVA followed by <sup>#</sup>p<0.05, <sup>##</sup>p<0.01 post hoc Sidak test was performed. N=6.

**Table 7. Effect of diet and Acot7 overexpression on Phosphatidylglycerol species.**

| PG species          | Control Chow | Acot7 Chow             | Control HFD | Acot7 HFD | 2-way ANOVA |      |       |
|---------------------|--------------|------------------------|-------------|-----------|-------------|------|-------|
|                     |              |                        |             |           | Interaction | Diet | Acot7 |
| PG (32:0) 16:0_16:0 | 2.2±0.1      | 2.6±0.2                | 3.6±0.3     | 3.9±0.4   |             | **   |       |
| PG (34:0) 16:0_18:0 | 2.2±0.2      | 2±0.7                  | 6.4±0.8     | 6.6±0.6   |             | **   |       |
| PG (34:1) 16:0_18:1 | 76.7±2.8     | 65.4±3.6               | 81.5±3.2    | 81.5±5.9  |             | *    |       |
| PG (34:2) 16:0_18:2 | 4.2±0.4      | 3.2±0.3                | 5.7±0.9     | 5.4±0.7   |             | *    |       |
| PG (36:1) 18:0_18:1 | 7.5±0.8      | 7.2±0.7                | 12.7±0.8    | 12.9±1    |             | **   |       |
| PG (36:2) 18:0_18:2 | 4.1±0.5      | 4.3±0.5                | 9.1±0.9     | 8.6±0.7   |             | **   |       |
| PG (36:2) 18:1_18:1 | 4.9±0.4      | 3.5±0.4 <sup>###</sup> | 3.6±0.4     | 3.2±0.4   |             |      | **    |
| PG (36:3) 18:1_18:2 | 1.2±0.5      | 0.3±0.2 <sup>#</sup>   | 0.9±0.2     | 1.6±0.2   | **          |      |       |

Phosphatidylglycerol content in each group. Data is mean ± SEM, nmol/g. \*p<0.05, \*\*p<0.01 2-way ANOVA followed by <sup>#</sup>p<0.05, <sup>###</sup>p<0.01 post hoc Sidak test was performed. N=6.

**Table 8. Effect of diet and Acot7 overexpression on Phosphatidylserine species.**

| PS species                                                                                                                                                                                        | Control Chow | Acot7 Chow              | Control HFD | Acot7 HFD | 2-way ANOVA |      |       |
|---------------------------------------------------------------------------------------------------------------------------------------------------------------------------------------------------|--------------|-------------------------|-------------|-----------|-------------|------|-------|
|                                                                                                                                                                                                   |              |                         |             |           | Interaction | Diet | Acot7 |
| PS (34:1) 16:0_18:1                                                                                                                                                                               | 2.5±0.5      | 0.9±0.6 <sup>#</sup>    | 0           | 0.7±0.5   | *           | *    |       |
| PS (36:1) 18:0_18:1                                                                                                                                                                               | 36.8±2.3     | 32.3±2.2                | 27.8±1.1    | 24.9±1.3  |             | **   |       |
| PS (36:2) 18:0_18:2                                                                                                                                                                               | 21.1±1.6     | 16.7±0.8                | 15.5±1.4    | 12.5±1    |             | **   | *     |
| PS (36:2) 18:1_18:1                                                                                                                                                                               | 1.7±0.1      | 1.6±0.1                 | 1.6±0.4     | 1.2±0.1   |             |      |       |
| PS (38:3) 18:0_20:3                                                                                                                                                                               | 16.5±1.2     | 13.4±0.5                | 11.4±0.6    | 11.8±0.6  |             | **   |       |
| PS (38:4) 18:0_20:4                                                                                                                                                                               | 39.3±2       | 30.1±1.3 <sup>#</sup>   | 46.7±2.3    | 45.4±2    |             | **   |       |
| PS (38:5) 18:1_20:4                                                                                                                                                                               | 2.7±0.2      | 1.8±0.5                 | 1.2±0.4     | 1.2±0.4   |             | *    |       |
| PS (40:4) 18:0_22:4                                                                                                                                                                               | 18±1         | 13±0.6                  | 33.3±1.8    | 31.3±2.1  |             | **   |       |
| PS (40:5) 18:0_22:5                                                                                                                                                                               | 60.6±3       | 43.7±1.8                | 86±5.4      | 87.9±8.3  |             | **   |       |
| PS (40:6) 18:0_22:6                                                                                                                                                                               | 236.1±8.4    | 179.1±9.8 <sup>##</sup> | 114±5.7     | 117.4±7.6 | **          | **   | **    |
| Phosphatidylserine content in each group. Data is mean ± SEM, nmol/g. *p<0.05, **p<0.01 2-way ANOVA followed by <sup>#</sup> p<0.05, <sup>##</sup> p<0.01 post hoc Sidak test was performed. N=6. |              |                         |             |           |             |      |       |



**Table 9. Effect of diet and Acot7 overexpression on Lysophosphatidylcholine species.**

| LPC species                                                                                                                                                                                          | Control Chow | Acot7 Chow             | Control HFD | Acot7 HFD | 2-way ANOVA |      |       |
|------------------------------------------------------------------------------------------------------------------------------------------------------------------------------------------------------|--------------|------------------------|-------------|-----------|-------------|------|-------|
|                                                                                                                                                                                                      |              |                        |             |           | Interaction | Diet | Acot7 |
| LPC 16:0                                                                                                                                                                                             | 71.6±3.8     | 61.5±3.8               | 73.1±3.5    | 70.1±4    |             |      |       |
| LPC 18:0                                                                                                                                                                                             | 39.6±2.2     | 32.5±1.8               | 47.1±2.5    | 45.6±3.6  |             | **   |       |
| LPC 18:1                                                                                                                                                                                             | 17.6±1       | 13.8±0.9 <sup>#</sup>  | 13.6±1      | 11.6±0.6  |             | **   | *     |
| LPC 18:2                                                                                                                                                                                             | 27±2         | 21.3±1.1               | 18.3±2.2    | 14.4±1.4  |             | **   | *     |
| LPC 20:4                                                                                                                                                                                             | 17.8±1.1     | 15.1±0.7               | 32.8±3.3    | 32±1.9    |             | **   |       |
| LPC 22:4                                                                                                                                                                                             | 4.7±0.6      | 2.7±0.7 <sup>###</sup> | 4±0.1       | 4.8±0.4   | **          |      |       |
| LPC 22:5                                                                                                                                                                                             | 2.7±0.3      | 2.2±0.2                | 3±0.4       | 2.9±0.2   |             |      |       |
| LPC 22:6                                                                                                                                                                                             | 11.4±0.8     | 9.9±0.9                | 4.6±0.5     | 4.8±0.5   |             | **   |       |
| Lysophosphatidylcholine content in each group. Data is mean ± SEM, nmol/g. * p<0.05, ** p<0.01 2-way ANOVA followed by <sup>#</sup> p<0.05, <sup>###</sup> p<0.01 post hoc Sidak test was performed. |              |                        |             |           |             |      |       |

**Table 10. Effect of diet and Acot7 overexpression on cardiolipin species.**

| CL species | Control Chow | Acot7 Chow            | Control HFD | Acot7 HFD              | 2-way ANOVA |      |       |
|------------|--------------|-----------------------|-------------|------------------------|-------------|------|-------|
|            |              |                       |             |                        | Interaction | Diet | Acot7 |
| CL 72:5    | 66±16.4      | 72.4±8.5              | 111.8±12.4  | 66.9±10.1 <sup>#</sup> | *           |      |       |
| CL 72:6    | 0.5±0.3      | 1.1±1.1               | 3.7±2.9     | 8.4±3.9                |             |      |       |
| CL 72:7    | 71.5±8.6     | 56.1±5.5              | 64±9.2      | 48.2±10.3              |             |      |       |
| CL 72:8    | 1446±86      | 970±72 <sup>#</sup>   | 1163.7±159  | 1079.7±86.4            |             |      | *     |
| CL 74:10   | 8.4±2.2      | 7.8±0.9               | 14.6±3.2    | 12.8±3.2               |             |      |       |
| CL 74:7    | 141.9±18.2   | 115.4±9               | 111.9±19.8  | 67.9±8.2               |             | *    | *     |
| CL 74:8    | 4.9±3.8      | 3±1.2                 | 16.5±6.9    | 25.4±6.7               |             | *    |       |
| CL 74:9    | 56±6.7       | 41.1±6.4              | 45.5±5.6    | 50.3±8.7               |             |      |       |
| CL 76:10   | 2.3±1.4      | 2.2±1.4               | 2.3±1.7     | 4.5±3.7                |             |      |       |
| CL 76:11   | 48.3±7.5     | 15.7±3.6 <sup>#</sup> | 26.1±5.9    | 39.1±9                 | **          |      |       |
| CL 76:12   | 7.4±5.2      | 24±2.6                | 11.7±2.7    | 16.4±5.2               |             |      |       |

Cardiolipin content in each group. Data is mean ± SEM, nmol/g. \*p<0.05, \*\*p<0.01 2-way ANOVA followed by <sup>#</sup>p<0.05, <sup>##</sup>p<0.01 post hoc Sidak test was performed. N=6.

**Table 11. Effect of diet and Acot7 overexpression on Ceramide species.**

| Cer species | Control Chow | Acot7 Chow           | Control HFD | Acot7 HFD | 2-way ANOVA |      |       |
|-------------|--------------|----------------------|-------------|-----------|-------------|------|-------|
|             |              |                      |             |           | Interaction | Diet | Acot7 |
| Cer 16:0    | 3.1±0.3      | 4.2±0.3 <sup>#</sup> | 3±0.1       | 3.2±0.3   |             |      | *     |
| Cer 18:0    | 23.1±1       | 20.4±1.1             | 23.3±1.1    | 24.9±1.2  |             | *    |       |
| Cer 19:0    | 0.5±0.1      | 0.5±0.1              | 0           | 0         |             | **   |       |
| Cer 20:0    | 1.1±0.1      | 1.2±0                | 1±0.1       | 0.9±0.1   |             |      |       |
| Cer 22:0    | 1.9±0.2      | 1.6±0.1              | 1.9±0.1     | 1.4±0.1   |             |      | *     |
| Cer 22:2    | 0.6±0.1      | 0.5±0.1              | 0.4±0.1     | 0.3±0.1   |             |      |       |
| Cer 23:0    | 2.1±0.3      | 1.7±0.1              | 1.6±0.1     | 1.3±0.1   |             |      |       |
| Cer 24:0    | 7±1          | 6.5±0.6              | 6.8±0.6     | 5.8±0.5   |             |      |       |
| Cer 24:1    | 6.8±1        | 6.8±0.4              | 5.4±0.3     | 4.7±0.3   |             | *    |       |
| Cer 24:2    | 0.8±0.1      | 0.9±0.1              | 0.8±0.1     | 0.8±0.1   |             |      |       |
| Cer 25:0    | 0.5±0.2      | 0.8±0.1              | 0.7±0.2     | 0.7±0.2   |             |      |       |

Ceramide content in each group. Data is mean ± SEM, nmol/g. \*p<0.05, \*\*p<0.01 2-way ANOVA followed by <sup>#</sup>p<0.05, <sup>##</sup>p<0.01 post hoc Sidak test was performed. N=6.

**Table 12. Effect of diet and Acot7 overexpression on Cholesterol esters and free cholesterol.**

| Species                                                                                                                                                                                                   | Control Chow | Acot7 Chow   | Control HFD  | Acot7 HFD    | 2-way ANOVA |      |       |
|-----------------------------------------------------------------------------------------------------------------------------------------------------------------------------------------------------------|--------------|--------------|--------------|--------------|-------------|------|-------|
|                                                                                                                                                                                                           |              |              |              |              | Interaction | Diet | Acot7 |
| CE 14:0                                                                                                                                                                                                   | 0            | 5.7±4.5      | 1.3±1        | 0            |             |      |       |
| CE 15:0                                                                                                                                                                                                   | 0            | 7.3±4.9      | 1.7±1.2      | 0            |             |      |       |
| CE 16:0                                                                                                                                                                                                   | 4.2±1.2      | 15±6.8       | 9.6±2.2      | 7.2±1        |             |      |       |
| CE 18:0                                                                                                                                                                                                   | 0            | 4±2.1        | 2.1±1.2      | 0            | *           |      |       |
| CE 18:1                                                                                                                                                                                                   | 3.9±0.4      | 8.9±5        | 4±0.2        | 4.4±0.7      |             |      |       |
| CE 18:2                                                                                                                                                                                                   | 6.2±0.5      | 6.4±1.5      | 6.7±0.5      | 6.9±0.6      |             |      |       |
| CE 20:4                                                                                                                                                                                                   | 13.8±1       | 11.7±1       | 26±2.2       | 25±2.3       |             | **   |       |
| CE 20:5                                                                                                                                                                                                   | 0.8±0.5      | 9.4±6.1      | 2.5±1.7      | 0.5±0.3      |             |      |       |
| CE 22:5                                                                                                                                                                                                   | 0            | 5±3.8        | 1.4±1.1      | 0            |             |      |       |
|                                                                                                                                                                                                           |              |              |              |              |             |      |       |
| Free Cholesterol                                                                                                                                                                                          | 2282.5±179.9 | 1883.1±135.5 | 1972.5±114.8 | 1629.8±109.9 |             | *    |       |
| Cholesterol esters and free cholesterol species content in each group. Data is mean ± SEM, nmol/g. * p<0.05, ** p<0.01 2-way ANOVA followed by #p<0.05, ###p<0.01 post hoc Sidak test was performed. N=6. |              |              |              |              |             |      |       |

**Full immunoblots used for representative blots in Figure 1 of “Increasing Acyl CoA thioesterase 7 activity alters phospholipid profile without effect on insulin action in skeletal muscle of rats.”**

Figure 1

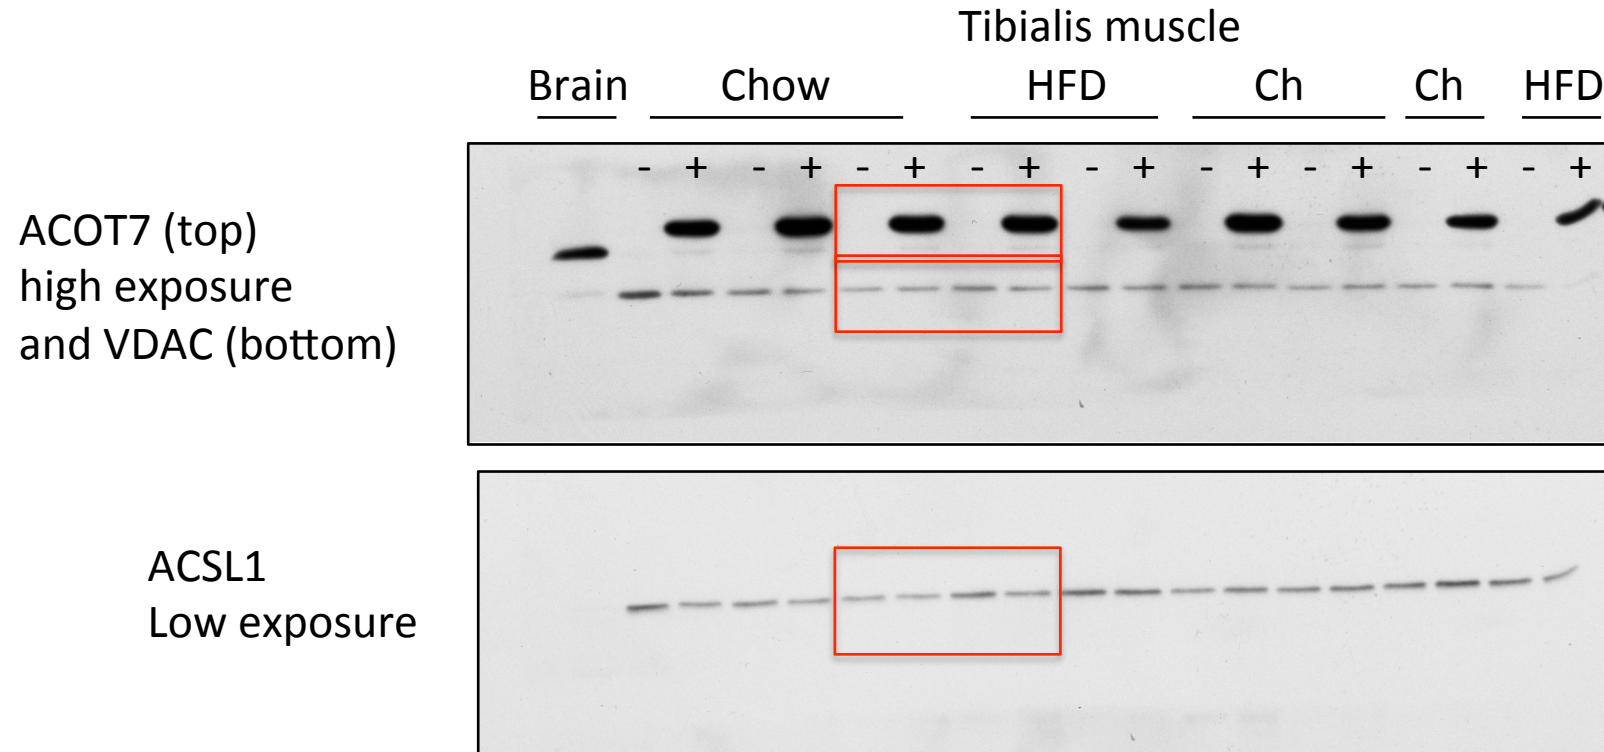

**Full immunoblots used for representative blots in Figure 4 of “Increasing Acyl CoA thioesterase 7 activity alters phospholipid profile without effect on insulin action in skeletal muscle of rats.”**

Figure 4

ACOT7

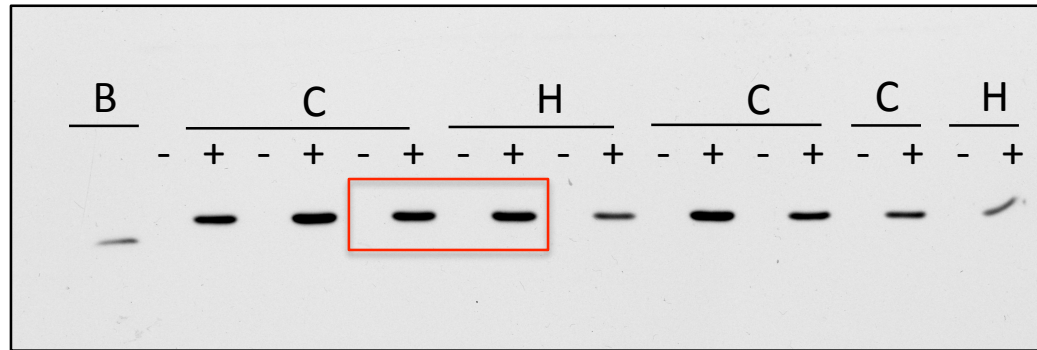

High exposure blot for mitochondrial proteins

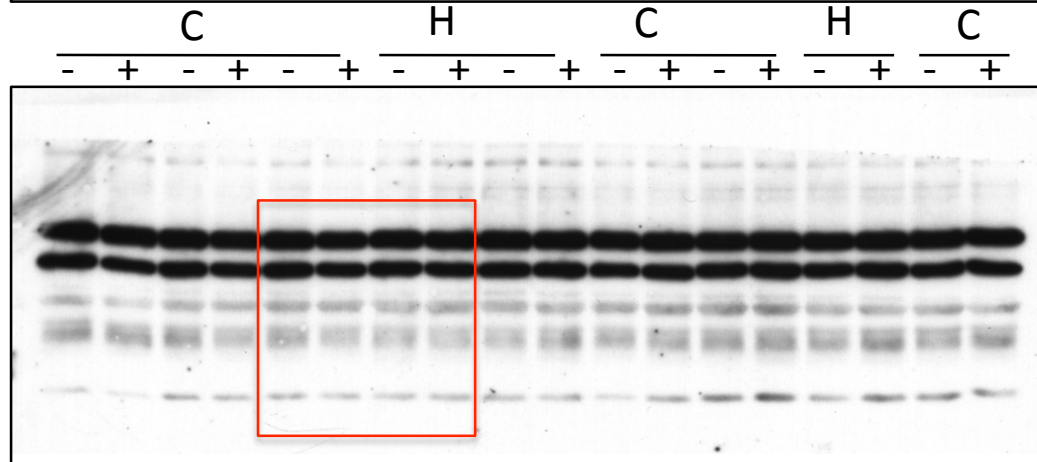

Complex V  
Complex III  
Complex IV  
Complex II  
Complex I

mitochondria blot probed for UCP3

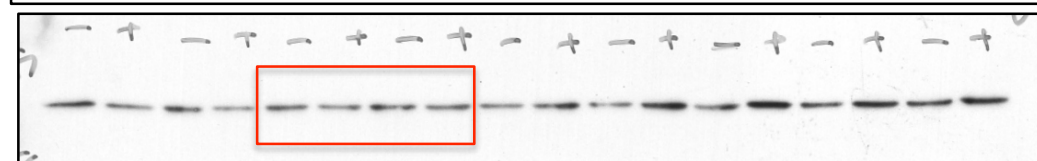

UCP3

VDAC

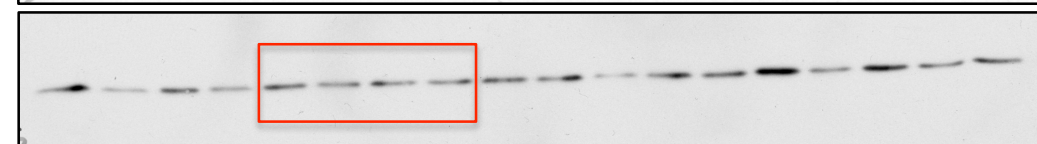

Supplement: 41598_2018_32354_MOESM1_ESM.pdf [file 41598_2018_32354_MOESM1_ESM.pdf]
